# Supplementary material for: Association between Unhealthful Plant-Based Diets and Possible Risk of Dyslipidemia
Source: MDPI journal article supplement (doi:10.3390/nu13124334), 2021-11-30
Supplement: s1 [file s1]

**Supplementary Table S1.** Nutritional characteristics of diet according to quintiles of plant-based diet indices among Korean adults.

|                                                | Quintile 1     | Quintile 2     | Quintile 3     | Quintile 4     | Quintile 5      | <i>P</i> -value |
|------------------------------------------------|----------------|----------------|----------------|----------------|-----------------|-----------------|
| <b>Overall plant-based diet index (PDI)</b>    |                |                |                |                |                 |                 |
| Total energy intake, kcal/day                  | 1832.9 (594.5) | 1787.0 (543.2) | 1749.6 (516.1) | 1720.4 (507.4) | 1664.5 (498.9)  | <0.0001         |
| Carbohydrate, % of energy                      | 68.6 (7.7)     | 70.9 (6.9)     | 71.9 (6.6)     | 72.9 (6.2)     | 74.4 (5.8)      | <0.0001         |
| Protein, % of energy                           | 13.9 (2.8)     | 13.4 (2.6)     | 13.4 (2.6)     | 13.3 (2.5)     | 13.1 (2.4)      | <0.0001         |
| Fat, % of energy                               | 16.1 (5.9)     | 14.4 (5.4)     | 13.7 (5.1)     | 12.9 (4.8)     | 11.9 (4.5)      | <0.0001         |
| Calcium, mg/1000 kcal                          | 231.7 (110.2)  | 241.3 (110.7)  | 254.4 (113.5)  | 263.9 (113.0)  | 278.4 (113.2)   | <0.0001         |
| Phosphorus, mg/1000 kcal                       | 500.2 (100.3)  | 501.2 (100.2)  | 508.9 (101.0)  | 514.9 (99.7)   | 521.9 (98.5)    | <0.0001         |
| Iron, mg/1000 kcal                             | 5.1 (1.5)      | 5.4 (1.6)      | 5.7 (1.7)      | 6.0 (1.8)      | 6.5 (2.0)       | <0.0001         |
| Potassium, mg/1000 kcal                        | 1098.6 (357.2) | 1197.8 (381.2) | 1294.9 (400.8) | 1378.6 (409.1) | 1508.8 (442.8)  | <0.0001         |
| Niacin, mg/1000 kcal                           | 8.1 (1.9)      | 8.1 (1.8)      | 8.2 (1.8)      | 8.4 (1.7)      | 8.5 (1.7)       | <0.0001         |
| Vitamin C, mg/1000 kcal                        | 43.5 (24.9)    | 53.3 (28.3)    | 61.7 (30.5)    | 69.0 (31.6)    | 80.7 (34.7)     | <0.0001         |
| Zinc, mg/1000 kcal                             | 4.7 (1.2)      | 4.5 (1.2)      | 4.5 (1.1)      | 4.5 (1.1)      | 4.4 (1.0)       | <0.0001         |
| Vitamin B-6, mg/1000 kcal                      | 0.8 (0.2)      | 0.9 (0.2)      | 0.9 (0.2)      | 0.9 (0.2)      | 1.0 (0.2)       | <0.0001         |
| Folate, µg /1000 kcal                          | 97.2 (39.8)    | 112.0 (44.6)   | 124.7 (48.7)   | 136.6 (51.4)   | 155.1 (57.9)    | <0.0001         |
| Beta-carotene, µg/1000 kcal                    | 1010.7 (682.4) | 1203.0 (795.0) | 1374.5 (887.3) | 1529.6 (940.9) | 1780.6 (1080.3) | <0.0001         |
| Fiber, g/1000 kcal                             | 2.5 (0.9)      | 3.0 (1.0)      | 3.3 (1.1)      | 3.7 (1.2)      | 4.2 (1.3)       | <0.0001         |
| Vitamin E, mg/1000 kcal                        | 4.1 (1.4)      | 4.3 (1.4)      | 4.6 (1.5)      | 4.8 (1.6)      | 5.2 (1.7)       | <0.0001         |
| Cholesterol, mg/1000 kcal                      | 109.7 (57.3)   | 97.1 (53.0)    | 92.0 (52.5)    | 85.9 (50.6)    | 74.8 (48.9)     | <0.0001         |
| <b>Healthful plant-based diet index (hPDI)</b> |                |                |                |                |                 |                 |
| Total energy intake, kcal/day                  | 1866.9 (590.5) | 1808.3 (555.6) | 1762.5 (525.7) | 1888.3 (608.8) | 1894.0 (629.3)  | <0.0001         |
| Carbohydrate, % of energy                      | 68.1 (6.6)     | 70.3 (6.7)     | 71.6 (6.6)     | 73.2 (6.4)     | 75.7 (6.0)      | <0.0001         |
| Protein, % of energy                           | 14.1 (2.5)     | 13.7 (2.6)     | 13.5 (2.6)     | 13.2 (2.6)     | 12.6 (2.4)      | <0.0001         |
| Fat, % of energy                               | 16.8 (5.1)     | 15.0 (5.1)     | 13.9 (5.0)     | 12.6 (4.8)     | 10.6 (4.5)      | <0.0001         |
| Calcium, mg/1000 kcal                          | 255.4 (100.1)  | 257.2 (110.5)  | 258.3 (115.1)  | 254.2 (119.8)  | 240.1 (121.5)   | <0.0001         |
| Phosphorus, mg/1000 kcal                       | 518.8 (89.3)   | 514.7 (98.4)   | 512.5 (101.6)  | 506.1 (105.0)  | 490.9 (106.2)   | <0.0001         |
| Iron, mg/1000 kcal                             | 5.5 (1.5)      | 5.6 (1.7)      | 5.7 (1.8)      | 5.8 (1.9)      | 5.8 (2.0)       | <0.0001         |
| Potassium, mg/1000 kcal                        | 1264.5 (359.2) | 1289.3 (402.3) | 1303.3 (422.4) | 1301.6 (446.2) | 1286.8 (481.7)  | <0.0001         |

|                                                  |                |                |                |                |                |         |
|--------------------------------------------------|----------------|----------------|----------------|----------------|----------------|---------|
| Niacin, mg/1000 kcal                             | 8.5 (1.7)      | 8.4 (1.8)      | 8.3 (1.8)      | 8.1 (1.8)      | 7.9 (1.8)      | <0.0001 |
| Vitamin C, mg/1000 kcal                          | 54.4 (26.2)    | 59.7 (30.3)    | 62.3 (32.5)    | 63.7 (34.8)    | 66.0 (37.9)    | <0.0001 |
| Zinc, mg/1000 kcal                               | 4.6 (1.1)      | 4.6 (1.1)      | 4.5 (1.1)      | 4.5 (1.2)      | 4.4 (1.0)      | <0.0001 |
| Vitamin B-6, mg/1000 kcal                        | 0.9 (0.2)      | 0.9 (0.2)      | 0.9 (0.2)      | 0.9 (0.2)      | 0.9 (0.2)      | <0.0001 |
| Folate, µg /1000 kcal                            | 119.9 (45.8)   | 124.1 (50.7)   | 125.8 (52.9)   | 126.0 (55.2)   | 125.1 (57.8)   | <0.0001 |
| Beta-carotene, µg/1000 kcal                      | 1305.7 (810.6) | 1371.9 (893.2) | 1385.3 (926.8) | 1389.4 (961.7) | 1385.3(1008.8) | <0.0001 |
| Fiber, g/1000 kcal                               | 3.1 (1.1)      | 3.2 (1.2)      | 3.4 (1.3)      | 3.4 (1.3)      | 3.5 (1.4)      | <0.0001 |
| Vitamin E, mg/1000 kcal                          | 4.7 (1.4)      | 4.6 (1.5)      | 4.6 (1.6)      | 4.5 (1.6)      | 4.4 (1.8)      | <0.0001 |
| Cholesterol, mg/1000 kcal                        | 113.3 (51.1)   | 101.0(52.5)    | 93.8 (53.8)    | 83.9 (51.7)    | 66.4 (48.5)    | <0.0001 |
| <b>Unhealthful plant-based diet index (uPDI)</b> |                |                |                |                |                |         |
| Total energy intake, kcal/day                    | 1790.4 (565.3) | 1809.3 (542.3) | 1782.0 (527.8) | 1747.8 (525.1) | 1637.8 (508.9) | <0.0001 |
| Carbohydrate, % of energy                        | 67.3 (6.4)     | 70.1 (6.5)     | 71.7 (6.4)     | 73.2 (6.3)     | 76.0 (5.7)     | <0.0001 |
| Protein, % of energy                             | 15.3 (2.6)     | 14.1 (2.4)     | 13.4 (2.3)     | 12.7 (2.2)     | 11.6 (1.9)     | <0.0001 |
| Fat, % of energy                                 | 17.0 (5.2)     | 15.0 (5.0)     | 13.9 (5.0)     | 12.8 (4.9)     | 10.7 (4.7)     | <0.0001 |
| Calcium, mg/1000 kcal                            | 319.0 (116.6)  | 275.6 (107.6)  | 251.9 (105.8)  | 227.0 (99.2)   | 190.9 (92.9)   | <0.0001 |
| Phosphorus, mg/1000 kcal                         | 580.8 (100.0)  | 533.9 (91.4)   | 507.5 (89.1)   | 480.1 (82.9)   | 441.4 (77.7)   | <0.0001 |
| Iron, mg/1000 kcal                               | 6.7 (1.8)      | 6.1 (1.6)      | 5.7 (1.6)      | 5.3 (1.5)      | 4.6 (1.5)      | <0.0001 |
| Potassium, mg/1000 kcal                          | 1532.5 (420.3) | 1376.7 (392.3) | 1286.9 (388.9) | 1190.0 (372.1) | 1049.3 (370.6) | <0.0001 |
| Niacin, mg/1000 kcal                             | 9.4 (1.8)      | 8.7 (1.7)      | 8.3 (1.7)      | 7.8 (1.6)      | 7.1 (1.5)      | <0.0001 |
| Vitamin C, mg/1000 kcal                          | 74.1 (32.8)    | 65.9 (32.0)    | 60.8 (31.9)    | 55.6 (30.7)    | 48.0 (29.3)    | <0.0001 |
| Zinc, mg/1000 kcal                               | 5.0 (1.2)      | 4.7 (1.2)      | 4.5 (1.0)      | 4.3 (1.0)      | 4.0 (0.8)      | <0.0001 |
| Vitamin B-6, mg/1000 kcal                        | 1.0 (0.2)      | 0.9 (0.2)      | 0.9 (0.2)      | 0.9 (0.2)      | 0.8 (0.2)      | <0.0001 |
| Folate, µg /1000 kcal                            | 140.5 (51.0)   | 130.1 (50.9)   | 124.1 (52.2)   | 117.2 (50.4)   | 107.9 (51.7)   | <0.0001 |
| Beta-carotene, µg/1000 kcal                      | 1606.2 (905.5) | 1457.4 (901.0) | 1371.6 (928.3) | 1259.8 (882.9) | 1126.2 (905.0) | <0.0001 |
| Fiber, g/1000 kcal                               | 3.6 (1.2)      | 3.4 (1.2)      | 3.3 (1.3)      | 3.2 (1.2)      | 3.0 (1.3)      | <0.0001 |
| Vitamin E, mg/1000 kcal                          | 5.5 (1.6)      | 4.9 (1.5)      | 4.5 (1.4)      | 4.2 (1.4)      | 3.7 (1.3)      | <0.0001 |
| Cholesterol, mg/1000 kcal                        | 129.8 (57.8)   | 105.0 (50.3)   | 91.0 (47.9)    | 78.4 (45.2)    | 58.1 (38.0)    | <0.0001 |
